# Supplementary material
Source: PubMed Central journal article supplement (PMC4348787)

A

**Mycgr3G91471**

MQFTQISLASAVFFLGMTVVKGVAVLPDSDQPTSPQPKPPAGDPNPFVWTPPEFPEDKPEDGYCKYTECDVNGAYETWLT  
 QEV<sup>C</sup>INSGFN<sup>Y</sup>QLEGH<sup>C</sup>WNNAGSYIDFLFTRN<sup>C</sup>QAYARMGWTEPTQLGKYHRWYDRKH<sup>Y</sup>ASEGVS<sup>A</sup>FC<sup>F</sup>H<sup>Y</sup> -154 aa's  
 Mature = -27 =127

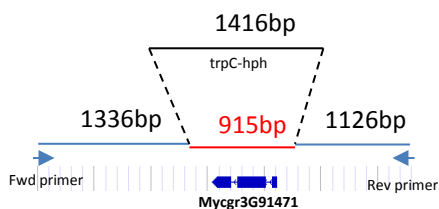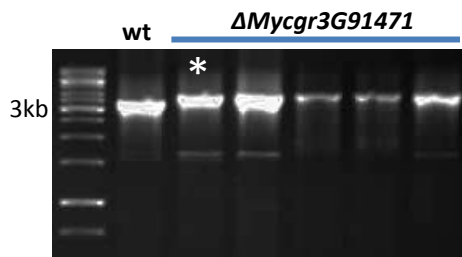**Mycgr3G103572**

MHAFKLCAVFSMMAATAFAHKCKPNPPASGYCYSPDMRACHHYHECKTPNGACGYNNKGEMVCS -66 aa's  
 Mature = -19= 47

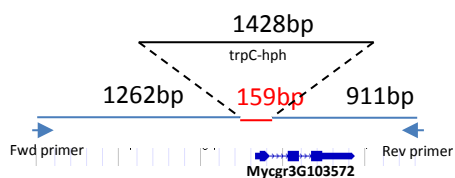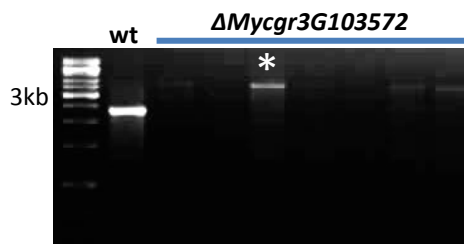**Mycgr3G107286**

MQYPKQPLIIAAILSMASHSLACVDFGFTISQFDYGVGDLSDNGVKICTFNGYGGNKGYNMCKNPGYSAYVPNGANTVEYKTPHG  
 DYT<sup>F</sup>FAT<sup>Q</sup>CH<sup>Y</sup>SSAGGTTQGGDIK<sup>V</sup>CIAT<sup>P</sup>FC -116 aa's  
 Mature = -22= 94

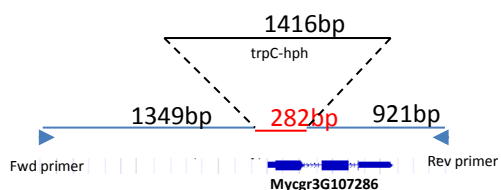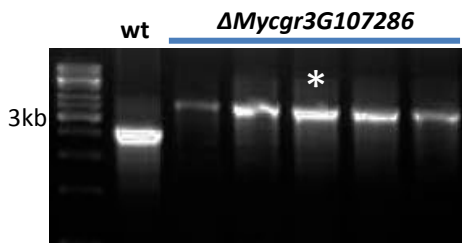**Mycgr3G102792**

MKISVMLAILATITAPVLAAPQDLVQREEMALERYATAFKRIRIEEVATTQDLPKREVDKLA<sup>F</sup>KRMEEELGQSLSKRHFDG<sup>C</sup>DF<sup>C</sup>L  
 ATEGTGPVPGTTYSI<sup>C</sup>CCQGC<sup>A</sup>CYGGK<sup>H</sup>C -114 aa's  
 Mature = -19= 95

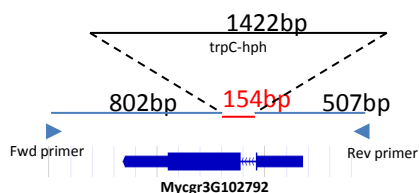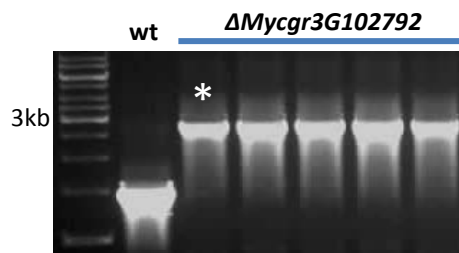**Mycgr3G108482**

MPSKIVLAHLFGAVSVVLARTSFHKERCCLWSDTLNRWYGLPSATQQA<sup>C</sup>NFIDHSDY<sup>E</sup>SDDEGW<sup>C</sup>HAKGGY<sup>G</sup>IVDE<sup>C</sup>FS<sup>C</sup>LC<sup>W</sup>NG  
 ANA<sup>H</sup>SCGGG<sup>G</sup>KWGGATTN<sup>C</sup>GH<sup>N</sup>C -108 aa's  
 Mature = -19= 89 aa's

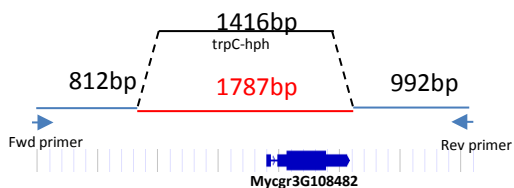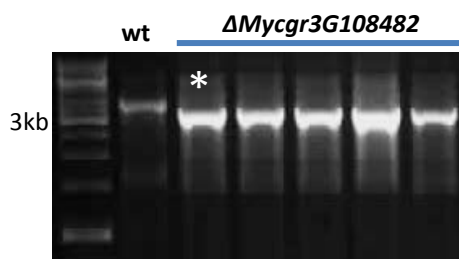

**B**

$\Delta$ Ku70 (IP0323)

$\Delta$  Mycgr3G91471\*

$\Delta$  Mycgr3G103572\*

$\Delta$  Mycgr3G107286\*

$\Delta$  Mycgr3G102792\*

$\Delta$  Mycgr3G108482\*

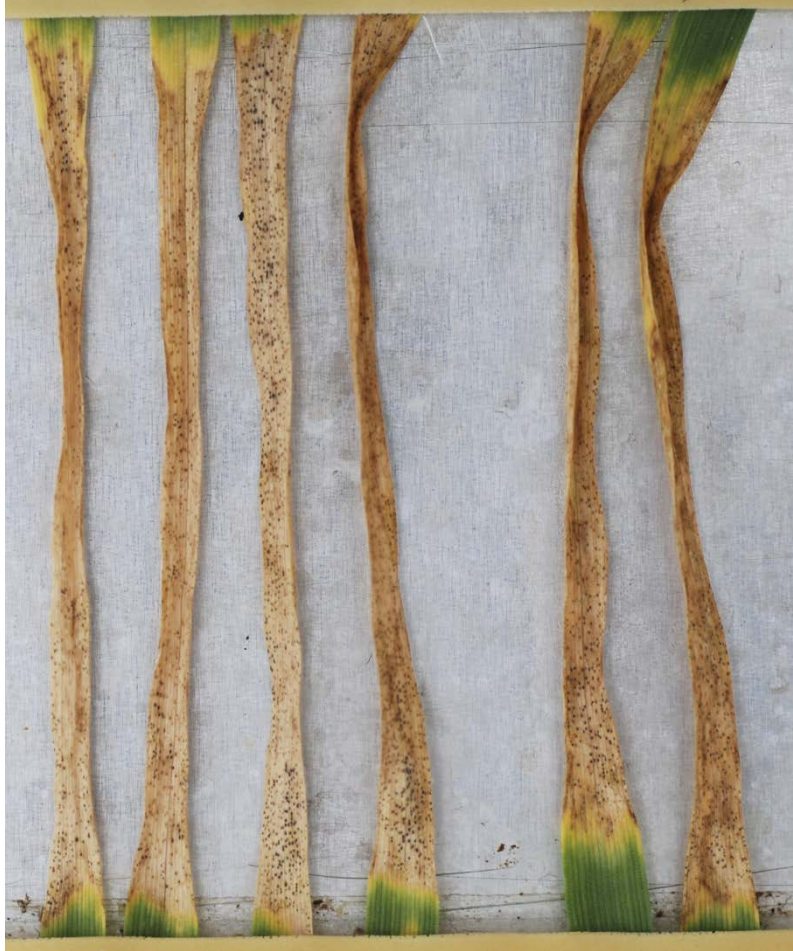

Supplement: supp_pp.114.255927_255927Suppl_Figure_2_new.pdf [file supp_pp.114.255927_255927Suppl_Figure_2_new.pdf]
