# Supplementary material
Source: PubMed Central journal article supplement (PMC4348787)
Supplement: supp_pp.114.255927_255927Suppl_Figure_3.pdf [file supp_pp.114.255927_255927Suppl_Figure_3.pdf]

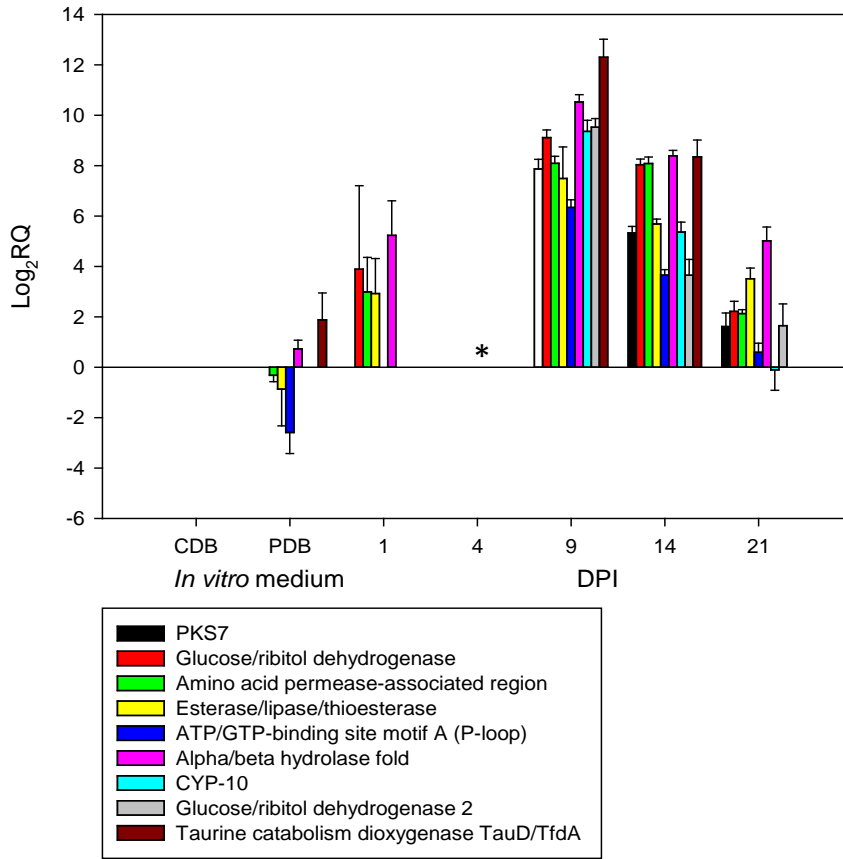

Supplementary Figure 3. qRT-PCR expression validation on the PKS7 metabolite cluster. \* failed cDNA synthesis.
