# Supplementary material
Source: PubMed Central journal article supplement (PMC4348787)
Supplement: supp_pp.114.255927_255927Suppl_Figure_4.pdf [file supp_pp.114.255927_255927Suppl_Figure_4.pdf]

A

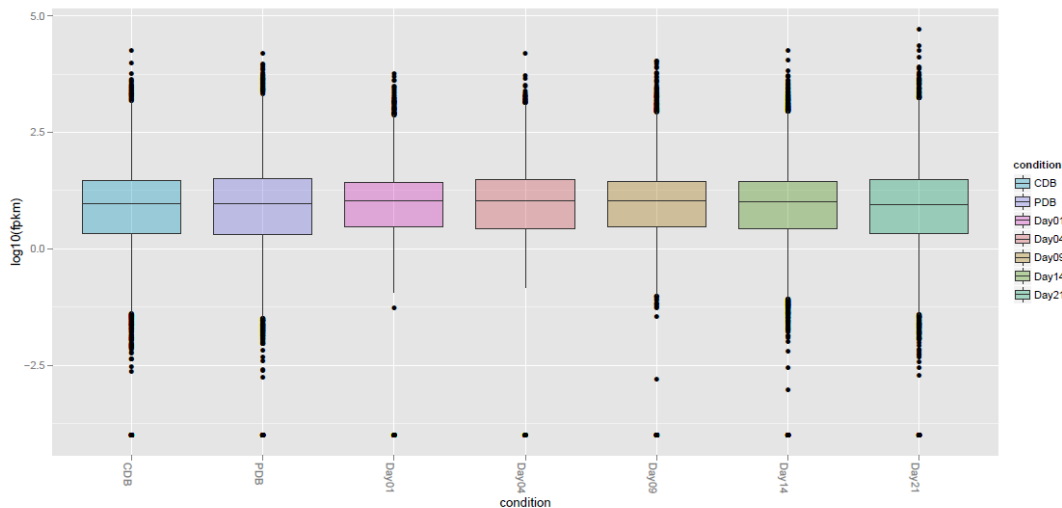

B

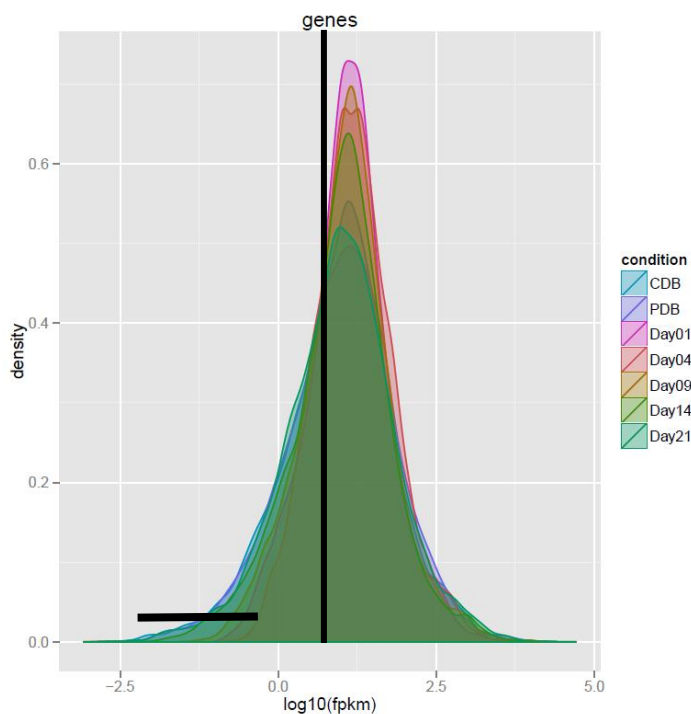

**Supplementary Figure 4.** (A) Boxplots display the range of FPKM values of all *Z. tritici* genes surrounding the the mean FPKM value for all conditions and time points. The data confirmed that there was no inflation of values at Day 1 or Day 4 as a consequence of less sequence depth. (B) Density plot displaying the number of genes at each mean FPKM value from each condition and time point. The solid bold line highlights the mean FPKM minimum cut-off of 5.0 used in the subsequent analysis of differential gene expression
