# Supplementary material
Source: PubMed Central journal article supplement (PMC4348787)

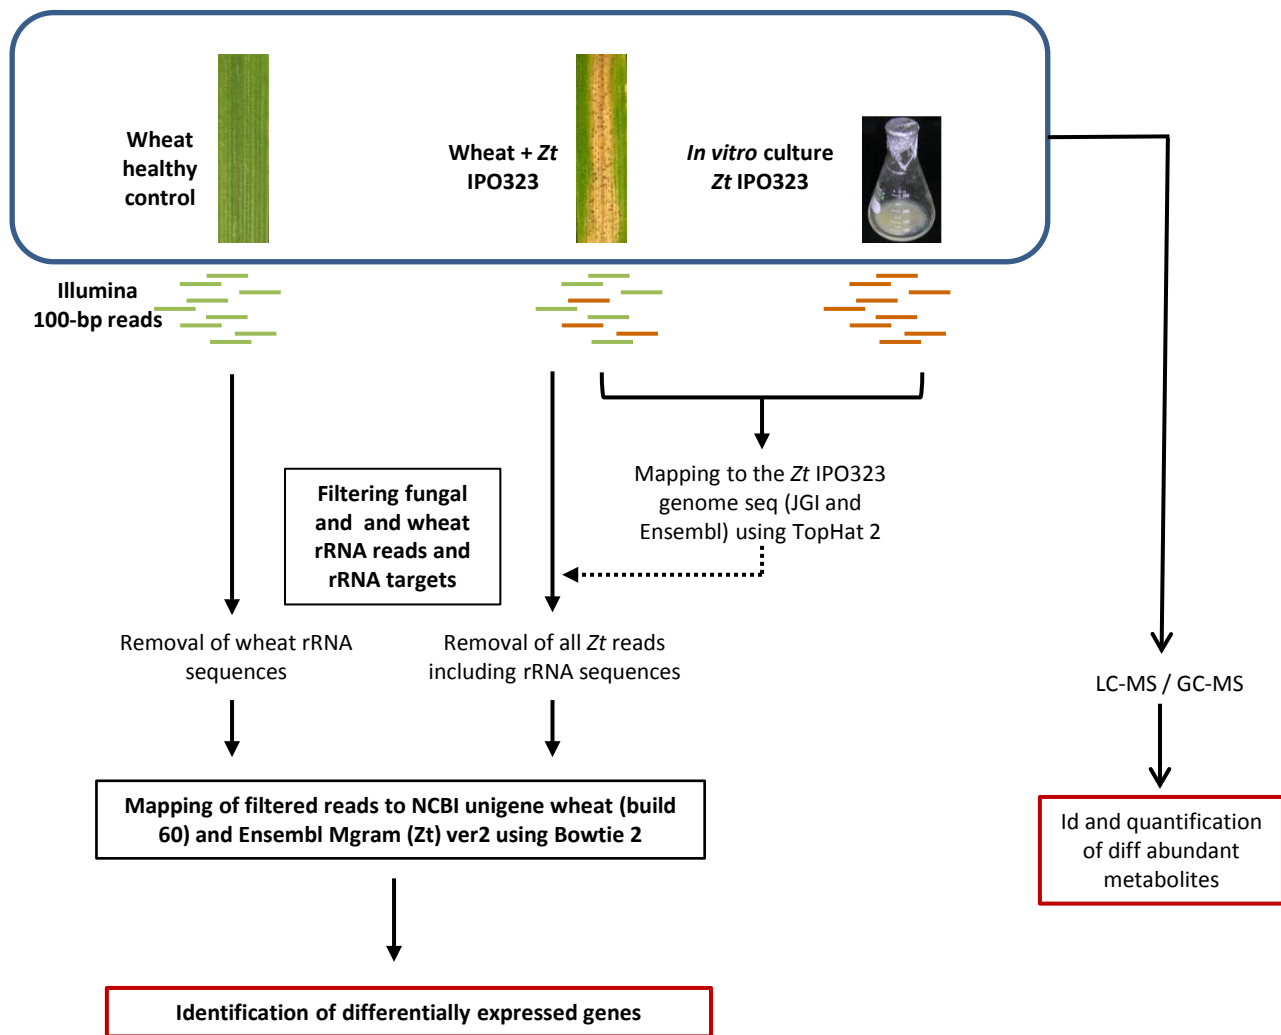

Supplementary Figure 1. Schematic overview of the experimental workflow

Supplement: supp_pp.114.255927_255927Suppl_Figure_1.pdf [file supp_pp.114.255927_255927Suppl_Figure_1.pdf]
